# Supplementary material for: Challenges in magnetic resonance imaging-based detection of clinically significant prostate cancer in young patients: two alternative approaches
Source: PubMed Central journal article supplement — Quant Imaging Med Surg. 2024 Nov 29;14(12):9419–30. doi: 10.21037/qims-24-1017 (PMC11652039; doi:10.21037/qims-24-1017), 2024-11-29
Supplement: qims-14-12-9419-rc.pdf [file qims-14-12-9419-rc.pdf]

## TRIPOD Checklist: Prediction Model Development and Validation

| Section                   | Item |     | Checklist description                                                                                                                                                                            | Reported on Page Number/Line Number                                           | Reported on Section/Paragraph      |
|---------------------------|------|-----|--------------------------------------------------------------------------------------------------------------------------------------------------------------------------------------------------|-------------------------------------------------------------------------------|------------------------------------|
| <b>Title and abstract</b> |      |     |                                                                                                                                                                                                  |                                                                               |                                    |
| Title                     | 1    | D;V | Identify the study as developing and/or validating a multivariable prediction model, the target population, and the outcome to be predicted.                                                     | Page 1/Line 1-2                                                               | Title                              |
| Abstract                  | 2    | D;V | Provide a summary of objectives, study design, setting, participants, sample size, predictors, outcome, statistical analysis, results, and conclusions.                                          | Page 1/Line 5-25<br>Page 2/Line 1-8                                           | Abstract/Paragraph 1-4             |
| <b>Introduction</b>       |      |     |                                                                                                                                                                                                  |                                                                               |                                    |
| Background and objectives | 3a   | D;V | Explain the medical context (including whether diagnostic or prognostic) and rationale for developing or validating the multivariable prediction model, including references to existing models. | Page 4/Line 11-22                                                             | Introduction/Paragraph 4           |
|                           | 3b   | D;V | Specify the objectives, including whether the study describes the development or validation of the model or both.                                                                                | Page 4/Line 23-25<br>Page 5/Line 1                                            | Introduction/Paragraph 5           |
| <b>Methods</b>            |      |     |                                                                                                                                                                                                  |                                                                               |                                    |
| Source of data            | 4a   | D;V | Describe the study design or source of data (e.g., randomized trial, cohort, or registry data), separately for the development and validation data sets, if applicable.                          | Page 5/Line 4-9                                                               | Material and methods/Paragraph 1   |
|                           | 4b   | D;V | Specify the key study dates, including start of accrual; end of accrual; and, if applicable, end of follow-up.                                                                                   | Page 5/Line 4-18                                                              | Material and methods/Paragraph 1-2 |
| Participants              | 5a   | D;V | Specify key elements of the study setting (e.g., primary care, secondary care, general population) including number and location of centres.                                                     | Page 5/Line 4-6                                                               | Material and methods//Paragraph 1  |
|                           | 5b   | D;V | Describe eligibility criteria for participants.                                                                                                                                                  | Page 5/Line 4-9                                                               | Material and methods/Paragraph 1   |
|                           | 5c   | D;V | Give details of treatments received, if relevant.                                                                                                                                                | N/A, the present study was a diagnostic study, but not an intervention study. | N/A                                |
| Outcome                   | 6a   | D;V | Clearly define the outcome that is predicted by the prediction model, including how and when assessed.                                                                                           | Page 6/Line 12                                                                | Material and methods/Paragraph 3   |

|             |    |     |                                                                                                                                               |                                                                                                                            |                                  |
|-------------|----|-----|-----------------------------------------------------------------------------------------------------------------------------------------------|----------------------------------------------------------------------------------------------------------------------------|----------------------------------|
|             | 6b | D;V | Report any actions to blind assessment of the outcome to be predicted.                                                                        | N/A, the outcome data were accurately extracted from the pathologic findings using a non-blind method.                     | N/A                              |
| Predictors  | 7a | D;V | Clearly define all predictors used in developing or validating the multivariable prediction model, including how and when they were measured. | Page 6/Line 20-25<br>Page 7/Line 1-2                                                                                       | Material and methods/Paragraph 5 |
|             | 7b | D;V | Report any actions to blind assessment of predictors for the outcome and other predictors.                                                    | N/A, the predictors data were accurately extracted from our paper-based prostate biopsy database using a non-blind method. | N/A                              |
| Sample size | 8  | D;V | Explain how the study size was arrived at.                                                                                                    | Page 5/Line 10-18                                                                                                          | Material and methods/Paragraph 2 |

|                              |     |     |                                                                                                                                                                                                       |                                                             |                                  |
|------------------------------|-----|-----|-------------------------------------------------------------------------------------------------------------------------------------------------------------------------------------------------------|-------------------------------------------------------------|----------------------------------|
| Missing data                 | 9   | D;V | Describe how missing data were handled (e.g., complete-case analysis, single imputation, multiple imputation) with details of any imputation method.                                                  | Page 5/Line 6-9                                             | Material and methods/Paragraph 1 |
| Statistical analysis methods | 10a | D   | Describe how predictors were handled in the analyses.                                                                                                                                                 | Page 6/Line 20-25<br>Page 7/Line 1-2                        | Material and methods/Paragraph 5 |
|                              | 10b | D   | Specify type of model, all model-building procedures (including any predictor selection), and method for internal validation.                                                                         | Page 6/Line 20-25<br>Page 7/Line 1-2                        | Material and methods/Paragraph 5 |
|                              | 10c | V   | For validation, describe how the predictions were calculated.                                                                                                                                         | Page 6/Line 23-25<br>Page 7/Line 1-2                        | Material and methods/Paragraph 5 |
|                              | 10d | D;V | Specify all measures used to assess model performance and, if relevant, to compare multiple models.                                                                                                   | Page 6/Line 20-25<br>Page 7/Line 1-2                        | Material and methods/Paragraph 5 |
|                              | 10e | V   | Describe any model updating (e.g., recalibration) arising from the validation, if done.                                                                                                               | N/A, the present study did not include external validation. | N/A                              |
| Risk groups                  | 11  | D;V | Provide details on how risk groups were created, if done.                                                                                                                                             | Page 6/Line 20-21                                           | Material and methods/Paragraph 5 |
| Development vs. validation   | 12  | V   | For validation, identify any differences from the development data in setting, eligibility criteria, outcome, and predictors.                                                                         | N/A, the present study did not include external validation. | N/A                              |
| <b>Results</b>               |     |     |                                                                                                                                                                                                       |                                                             |                                  |
| Participants                 | 13a | D;V | Describe the flow of participants through the study, including the number of participants with and without the outcome and, if applicable, a summary of the follow-up time. A diagram may be helpful. | Page 7/Line 10-13                                           | Results/Paragraph 1              |
|                              | 13b | D;V | Describe the characteristics of the participants (basic demographics, clinical features, available predictors), including the number of participants with missing data for predictors and outcome.    | Page 8/Line 18-22                                           | Results/Paragraph 3              |
|                              | 13c | V   | For validation, show a comparison with the development data of the distribution of important variables (demographics, predictors and outcome).                                                        | N/A, the present study did not include external validation. | N/A                              |
| Model development            | 14a | D   | Specify the number of participants and outcome events in each analysis.                                                                                                                               | Page 7/Line 10-24                                           | Results/Paragraph 1              |
|                              | 14b | D   | If done, report the unadjusted association between each candidate predictor and outcome.                                                                                                              | Page 8/Line 23-25                                           | Results/Paragraph 4              |
| Model specification          | 15a | D   | Present the full prediction model to allow predictions for individuals (i.e., all regression coefficients, and model intercept or baseline survival at a given time point).                           | Page 8/Line 23-25<br>Page 9/Line 1-8                        | Results/Paragraph 4              |

|                   |     |     |                                                                                                                  |                                                             |                        |
|-------------------|-----|-----|------------------------------------------------------------------------------------------------------------------|-------------------------------------------------------------|------------------------|
|                   | 15b | D   | Explain how to use the prediction model.                                                                         | Page 9/Line 6-7                                             | Results/Paragraph 4    |
| Model performance | 16  | D;V | Report performance measures (with CIs) for the prediction model.                                                 | Page 9/Line 4-5                                             | Results/Paragraph 4    |
| Model-updating    | 17  | V   | If done, report the results from any model updating (i.e., model specification, model performance).              | N/A, the present study did not include external validation. | N/A                    |
| <b>Discussion</b> |     |     |                                                                                                                  |                                                             |                        |
| Limitations       | 18  | D;V | Discuss any limitations of the study (such as nonrepresentative sample, few events per predictor, missing data). | Page 12/Line 24-25<br>Page 13/Line 1-15                     | Discussion/Paragraph 4 |

|                           |     |     |                                                                                                                                                    |                                                        |                              |
|---------------------------|-----|-----|----------------------------------------------------------------------------------------------------------------------------------------------------|--------------------------------------------------------|------------------------------|
| Interpretation            | 19a | V   | For validation, discuss the results with reference to performance in the development data, and any other validation data.                          | Page 11/Line 18-25<br>Page 12/Line 1-23                | Discussion/Paragraph 3       |
|                           | 19b | D;V | Give an overall interpretation of the results, considering objectives, limitations, and results from similar studies, and other relevant evidence. | Page 11/Line 18-25<br>Page 12/Line 1-23                | Discussion/Paragraph 3       |
| Implications              | 20  | D;V | Discuss the potential clinical use of the model and implications for future research.                                                              | Page 13/Line 18-25                                     | Conclusion/Paragraph 1       |
| <b>Other information</b>  |     |     |                                                                                                                                                    |                                                        |                              |
| Supplementary information | 21  | D;V | Provide information about the availability of supplementary resources, such as study protocol, Web calculator, and data sets.                      | NA, all the data mentioned in this study was presented | N/A                          |
| Funding                   | 22  | D;V | Give the source of funding and the role of the funders for the present study.                                                                      | Page 14/Line 2-3                                       | Acknowledgments/ Paragraph 1 |

\* Items relevant only to the development of a prediction model are denoted by D, items relating solely to a validation of a prediction model are denoted by V, and items relating to both are denoted D;V. We recommend using the TRIPOD Checklist in conjunction with the TRIPOD Explanation and Elaboration document.

Article information: <https://dx.doi.org/10.21037/qims-24-1017>

\*As the checklist was provided upon initial submission, the page number/line number reported may be changed due to copyediting and may not be referable in the published version. In this case, the section/paragraph may be used as an alternative reference.
