# Supplementary material for: Challenges in magnetic resonance imaging-based detection of clinically significant prostate cancer in young patients: two alternative approaches
Source: PubMed Central journal article supplement — Quant Imaging Med Surg. 2024 Nov 29;14(12):9419–30. doi: 10.21037/qims-24-1017 (PMC11652039; doi:10.21037/qims-24-1017), 2024-11-29
Supplement: qims-14-12-9419-supplementary.pdf [file qims-14-12-9419-supplementary.pdf]

**Table S1** The diagnostic parameters with different PI-RADS cutoff values on csPCa among young suspected patients

| PI-RADS | Se    | Sp    | Accuracy | PPV   | NPV   |
|---------|-------|-------|----------|-------|-------|
| ≥3      | 0.894 | 0.488 | 0.580    | 0.339 | 0.940 |
| ≥4      | 0.809 | 0.775 | 0.783    | 0.514 | 0.932 |

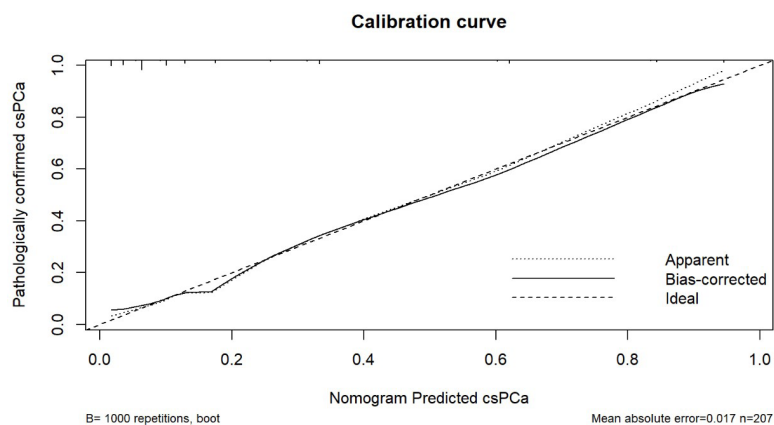

**Figure S1** Calibration curves of the special nomogram for young patients suspected to prostate cancer.
